# Supplementary figures and images for: Flat bands and gaps in twisted double bilayer graphene
Source: Royal Society of Chemistry journal article supplement (doi:10.1039/c9nr10830k), 2020-01-01

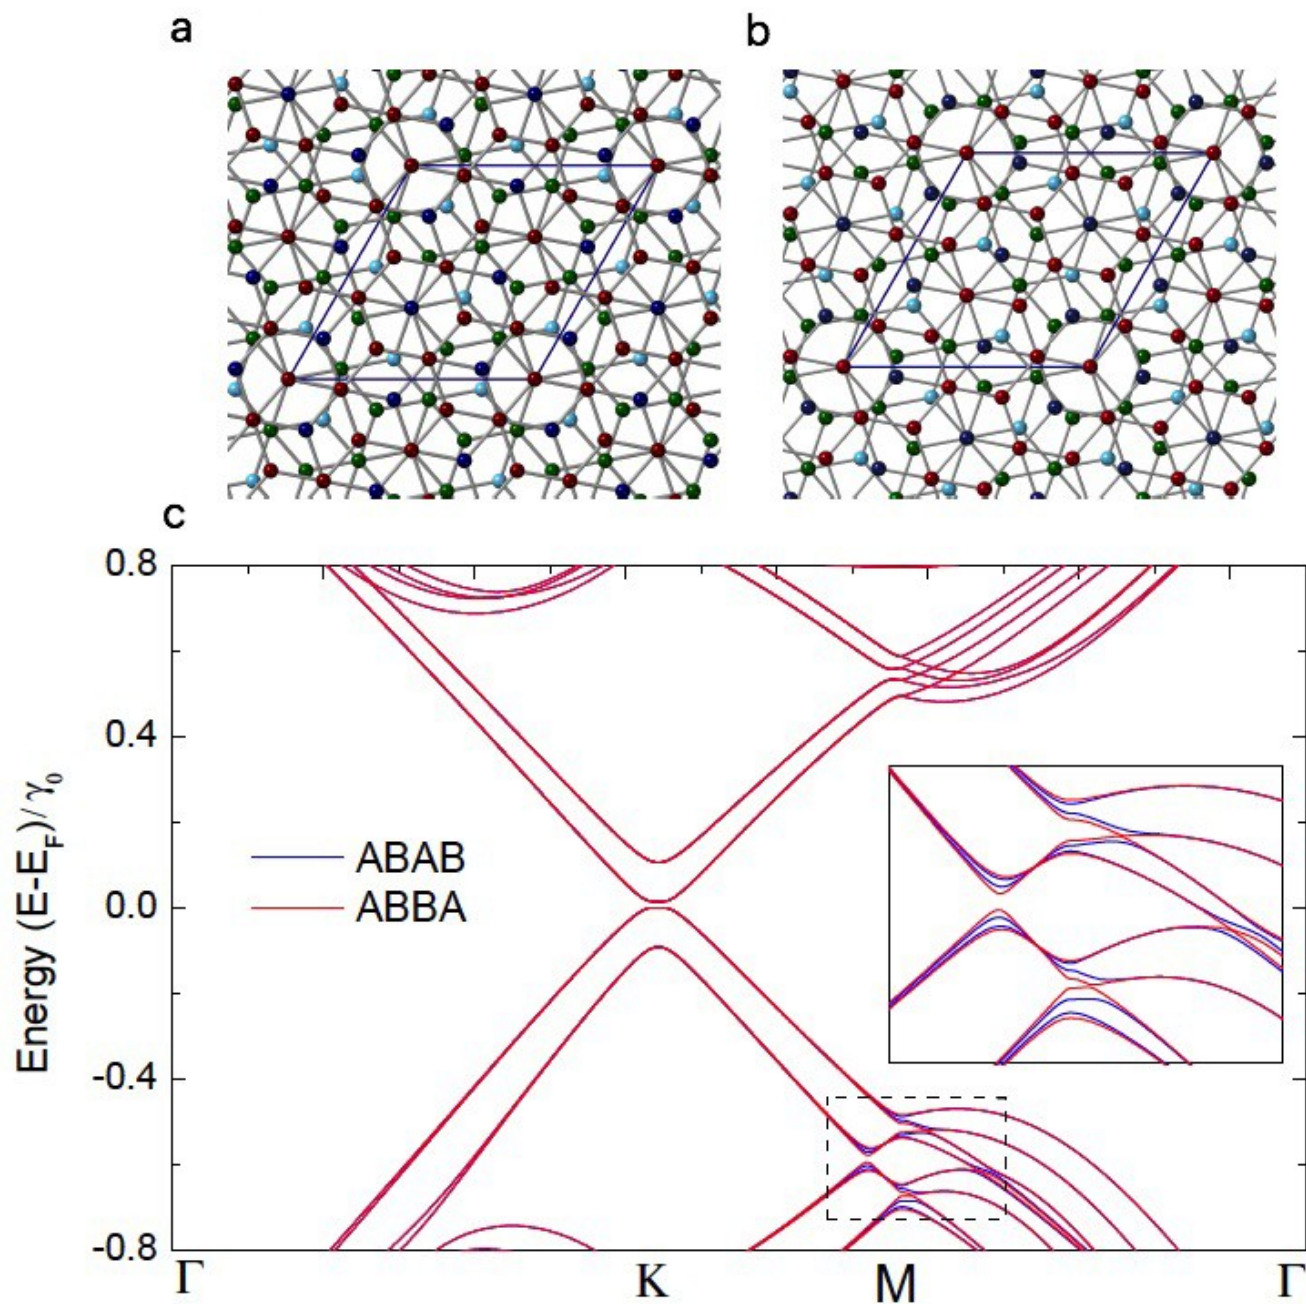

Supplement: c9nr10830k1.pdf [file c9nr10830k1.pdf]
